# Supplementary material for: Development of sex-linked markers for gender identification of Actinidia arguta
Source: Springer Nature journal article supplement (doi:10.1038/s41598-023-39561-0), 2023-08-07
Supplement: MOESM1 [file 41598_2023_39561_MOESM1_ESM.pdf]

Supplemental Figure

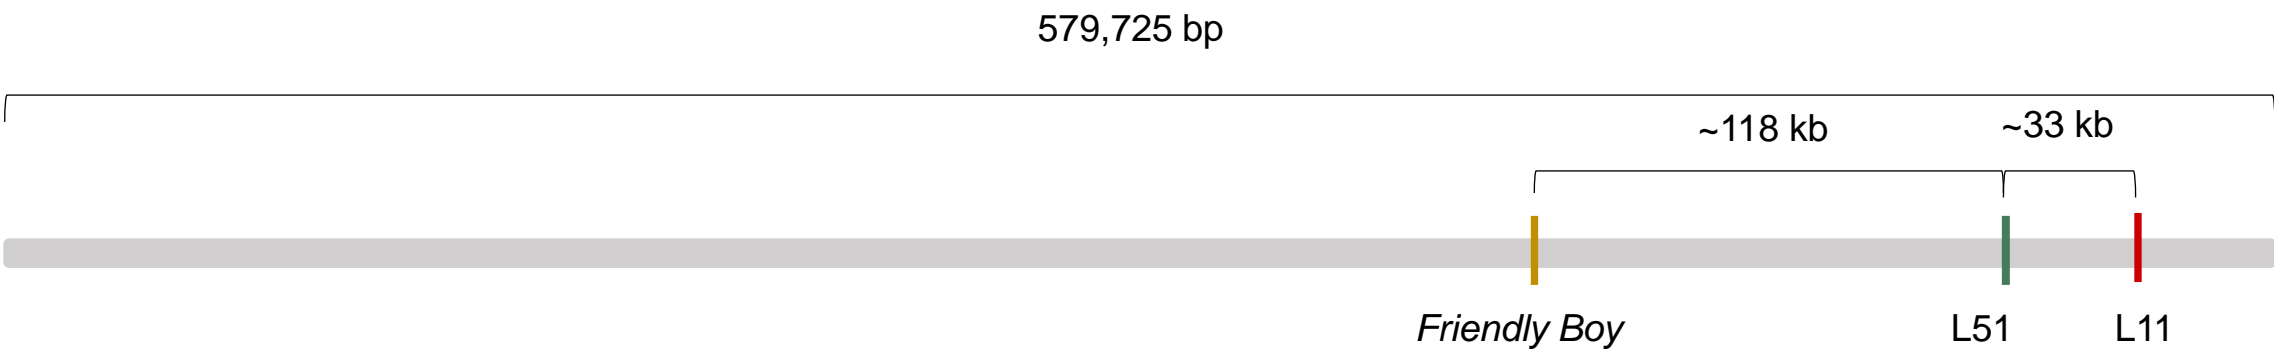

**Figure S1. Putative physical loci of homology regions of L51 and L11 on male-specific region of *A. chinensis***  
Note: L51 and L11 were aligned to different parts of LC482709.1, respectively. The male sex-determining gene *Friendly boy* of *A. chinensis* is also located on LC482709.1 (Akagi et al. 2019. Nature Plants.). The distance between L51 and L11 is ~33kb, and the distance between *Friendly boy* and L51 is ~118kb.
